# Supplementary material for: Modulating the solubility and pharmacokinetic properties of 5-fluorouracil via cocrystallization
Source: Royal Society of Chemistry journal article supplement (doi:10.1039/d0ce00409j), 2020-01-01
Supplement: d0ce00409j1.pdf [file d0ce00409j1.pdf]

## Supplementary data for

### **Modulating the solubility and pharmacokinetic property of 5-fluorouracil *via* cocrystals**

**Xia-Lin Dai, Chao Wu, Jin-Hui Li, Lian-Chao Liu, Xin He, Tong-Bu Lu and Jia-Mei Chen\***

**Table S1** Hydrogen bonding distances and angles of **5FU-34DHBA·2H<sub>2</sub>O**, **5FU-35DHBA** and **5FU-25DHBA**.

| Hydrogen bond                     | H···A (Å) | D···A (Å) | ∠D–H···A (°) | Symmetry         |
|-----------------------------------|-----------|-----------|--------------|------------------|
| <b>5FU-34DHBA·2H<sub>2</sub>O</b> |           |           |              |                  |
| O4-H4···O1                        | 2.05      | 2.853(17) | 167.2        | 2-x,4-y,2-z      |
| O3-H3···O8                        | 1.92      | 2.735(17) | 174.7        | 1+x,1+y,1+z      |
| N2-H2B···O6                       | 2.08      | 2.925(19) | 167.6        | -x,2-y,1-z       |
| O8-H8B···O6                       | 1.98      | 2.816(17) | 165.8        | -x,1-y,1-z       |
| O7-H7A···O5                       | 1.82      | 2.670(18) | 175.9        | x,-1+y,z         |
| N1-H1···O4                        | 2.12      | 2.921(18) | 155.5        |                  |
| N1-H1···O3                        | 2.36      | 3.011(19) | 132.5        |                  |
| O8-H8A···O7                       | 1.97      | 2.794(19) | 163.8        |                  |
| O2-H2···O7                        | 1.84      | 2.634(18) | 163.1        |                  |
| <b>5FU-35DHBA</b>                 |           |           |              |                  |
| O3-H3···O5                        | 1.99      | 2.729(18) | 150.5        | -x+1, -y, -z+1   |
| O4-H4···O2                        | 1.90      | 2.719(19) | 175.1        | x-2, y-1, z-1    |
| N1-H1···O1                        | 1.96      | 2.820(2)  | 174.4        | -x+2, -y+2, -z+2 |
| O6-H6···O1                        | 1.86      | 2.667(19) | 167.4        |                  |
| N2-H2···O5                        | 2.04      | 2.879(2)  | 164.4        |                  |
| <b>5FU-25DHBA</b>                 |           |           |              |                  |
| N1-H1···O4                        | 2.01      | 2.871(18) | 173.3        | -x+1, -y, -z     |
| N2-H2A···O1                       | 2.01      | 2.840(19) | 160.9        | x, y-1, z        |
| O2-H2···O5                        | 1.78      | 2.597(18) | 174.3        | x, y+1, z        |
| O4-H4A···O6                       | 1.89      | 2.708(17) | 174.7        | x+1, y-1, z      |
| O3-H3···O1                        | 1.90      | 2.612(16) | 144.6        |                  |

**Table S2** Bond lengths for **5FU-34DHBA·2H<sub>2</sub>O**.

| Atom | Atom | Length/Å | Atom | Atom | Length/Å |
|------|------|----------|------|------|----------|
| F1   | C10  | 1.348(2) | C3   | C2   | 1.378(2) |
| O4   | C3   | 1.367(2) | C3   | C4   | 1.406(2) |
| O3   | C4   | 1.361(2) | C9   | C10  | 1.333(3) |
| N2   | C11  | 1.371(2) | C6   | C5   | 1.385(3) |
| N2   | C8   | 1.378(2) | C6   | C1   | 1.395(2) |
| O5   | C8   | 1.223(2) | C10  | C11  | 1.440(2) |
| O2   | C7   | 1.321(2) | C5   | C4   | 1.383(2) |
| N1   | C9   | 1.369(2) | C7   | C1   | 1.482(2) |
| N1   | C8   | 1.360(2) | C1   | C2   | 1.393(2) |
| O1   | C7   | 1.216(2) | C11  | O6   | 1.236(2) |

**Table S3** Bond angles for **5FU-34DHBA·2H<sub>2</sub>O**.

| Atom | Atom | Atom | Angle/°    | Atom | Atom | Atom | Angle/°    |
|------|------|------|------------|------|------|------|------------|
| C11  | N2   | C8   | 126.62(15) | C6   | C1   | C7   | 121.53(16) |
| C8   | N1   | C9   | 123.07(15) | C2   | C1   | C6   | 119.38(16) |
| O4   | C3   | C2   | 123.78(15) | C2   | C1   | C7   | 119.08(15) |
| O4   | C3   | C4   | 116.62(14) | N2   | C11  | C10  | 113.22(15) |
| C2   | C3   | C4   | 119.60(16) | O6   | C11  | N2   | 121.93(15) |
| C10  | C9   | N1   | 119.59(16) | O6   | C11  | C10  | 124.85(15) |
| C5   | C6   | C1   | 119.67(16) | C3   | C2   | C1   | 120.92(16) |
| F1   | C10  | C11  | 116.08(15) | O3   | C4   | C3   | 116.65(15) |
| C9   | C10  | F1   | 121.66(15) | O3   | C4   | C5   | 124.03(15) |
| C9   | C10  | C11  | 122.24(16) | C5   | C4   | C3   | 119.32(15) |
| C4   | C5   | C6   | 121.07(16) | O5   | C8   | N2   | 122.01(16) |
| O2   | C7   | C1   | 113.24(15) | O5   | C8   | N1   | 122.79(16) |
| O1   | C7   | O2   | 123.06(16) | N1   | C8   | N2   | 115.20(15) |
| O1   | C7   | C1   | 123.70(16) |      |      |      |            |

**Table S4** Bond lengths for **5FU-35DHBA**.

| Atom | Atom | Length/Å   | Atom | Atom | Length/Å |
|------|------|------------|------|------|----------|
| F1   | C3   | 1.345(2)   | N1   | C2   | 1.385(2) |
| O1   | C1   | 1.238(2)   | C9   | C8   | 1.388(2) |
| O5   | C11  | 1.228(2)   | C9   | C10  | 1.401(2) |
| O3   | C7   | 1.3735(19) | C6   | C5   | 1.400(2) |
| O4   | C9   | 1.3549(19) | C6   | C7   | 1.381(2) |
| O6   | C11  | 1.318(2)   | C8   | C7   | 1.396(2) |
| O2   | C2   | 1.225(2)   | C5   | C11  | 1.483(2) |
| N2   | C1   | 1.353(2)   | C5   | C10  | 1.388(2) |
| N2   | C4   | 1.375(2)   | C2   | C3   | 1.431(3) |
| N1   | C1   | 1.370(2)   | C3   | C4   | 1.347(3) |

**Table S5** Bond angles for **5FU-35DHBA**.

| Atom | Atom | Atom | Angle/°    | Atom | Atom | Atom | Angle/°    |
|------|------|------|------------|------|------|------|------------|
| C1   | N2   | C4   | 122.92(16) | O3   | C7   | C8   | 116.83(16) |
| C1   | N1   | C2   | 126.05(15) | C6   | C7   | C8   | 121.11(16) |
| O4   | C9   | C8   | 122.50(16) | O5   | C11  | O6   | 122.31(16) |
| O4   | C9   | C10  | 116.54(15) | O5   | C11  | C5   | 123.58(14) |
| C8   | C9   | C10  | 120.96(16) | O6   | C11  | C5   | 114.10(13) |
| O1   | C1   | N2   | 122.73(16) | C5   | C10  | C9   | 118.72(15) |
| O1   | C1   | N1   | 121.29(16) | O2   | C2   | N1   | 120.86(16) |
| N2   | C1   | N1   | 115.98(15) | O2   | C2   | C3   | 125.80(16) |
| C7   | C6   | C5   | 119.10(15) | N1   | C2   | C3   | 113.33(16) |
| C9   | C8   | C7   | 119.07(17) | F1   | C3   | C2   | 116.52(16) |
| C6   | C5   | C11  | 118.17(14) | F1   | C3   | C4   | 121.23(17) |
| C10  | C5   | C6   | 121.02(16) | C4   | C3   | C2   | 122.24(16) |
| C10  | C5   | C11  | 120.81(14) | C3   | C4   | N2   | 119.22(17) |
| O3   | C7   | C6   | 122.06(14) |      |      |      |            |

**Table S6** Bond lengths for **5FU-25DHBA**.

| Atom | Atom | Length/Å | Atom | Atom | Length/Å |
|------|------|----------|------|------|----------|
| C1   | C2   | 1.474(2) | C6   | O4   | 1.372(2) |
| C1   | O1   | 1.231(2) | C8   | N1   | 1.371(2) |
| C1   | O2   | 1.318(2) | C8   | N2   | 1.364(2) |
| C2   | C3   | 1.410(2) | C8   | O5   | 1.227(2) |
| C2   | C7   | 1.394(3) | C9   | C10  | 1.335(3) |
| C3   | C4   | 1.392(3) | C9   | N2   | 1.369(2) |
| C3   | O3   | 1.360(2) | C10  | C11  | 1.450(2) |
| C4   | C5   | 1.378(3) | C10  | F1   | 1.345(2) |
| C5   | C6   | 1.396(2) | C11  | N1   | 1.376(2) |
| C6   | C7   | 1.378(2) | C11  | O6   | 1.222(2) |

**Table S7** Bond angles for **5FU-25DHBA**.

| Atom | Atom | Atom | Angle/°    | Atom | Atom | Atom | Angle/°    |
|------|------|------|------------|------|------|------|------------|
| O1   | C1   | C2   | 122.45(14) | C6   | C7   | C2   | 120.30(15) |
| O1   | C1   | O2   | 122.70(15) | N2   | C8   | N1   | 115.48(16) |
| O2   | C1   | C2   | 114.84(15) | O5   | C8   | N1   | 121.37(15) |
| C3   | C2   | C1   | 119.27(15) | O5   | C8   | N2   | 123.15(16) |
| C7   | C2   | C1   | 120.55(14) | C10  | C9   | N2   | 120.08(15) |
| C7   | C2   | C3   | 120.19(15) | C9   | C10  | C11  | 121.97(17) |
| C4   | C3   | C2   | 118.40(16) | C9   | C10  | F1   | 121.44(15) |
| O3   | C3   | C2   | 123.50(16) | F1   | C10  | C11  | 116.58(15) |
| O3   | C3   | C4   | 118.09(14) | N1   | C11  | C10  | 112.82(15) |
| C5   | C4   | C3   | 121.14(15) | O6   | C11  | C10  | 125.11(17) |
| C4   | C5   | C6   | 120.12(16) | O6   | C11  | N1   | 122.06(16) |
| C7   | C6   | C5   | 119.83(16) | C8   | N1   | C11  | 126.98(14) |
| O4   | C6   | C5   | 122.47(16) | C8   | N2   | C9   | 122.62(15) |
| O4   | C6   | C7   | 117.69(15) |      |      |      |            |

(a)

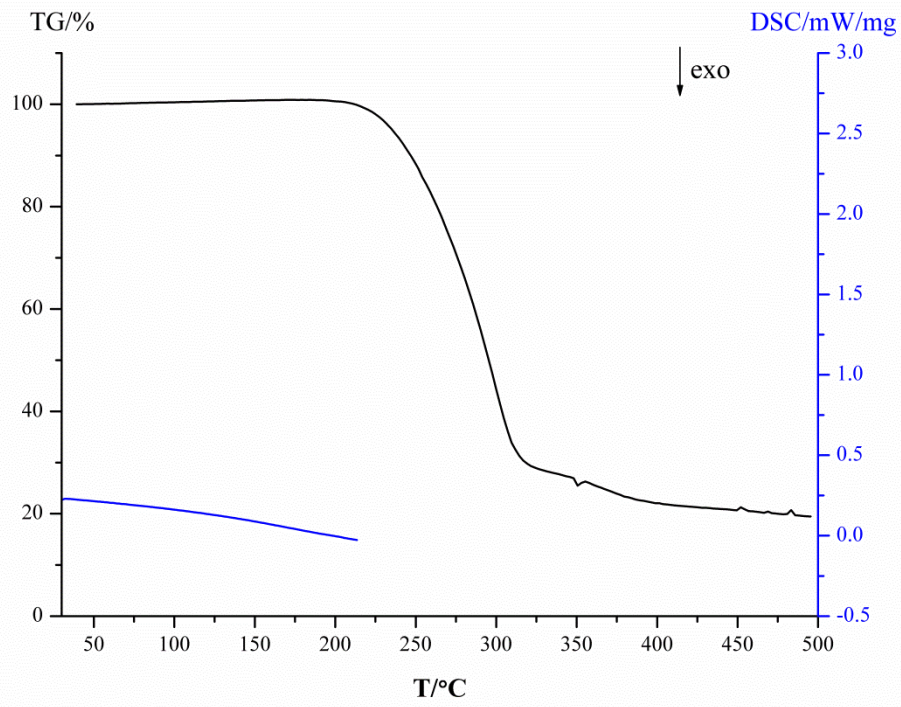

(b)

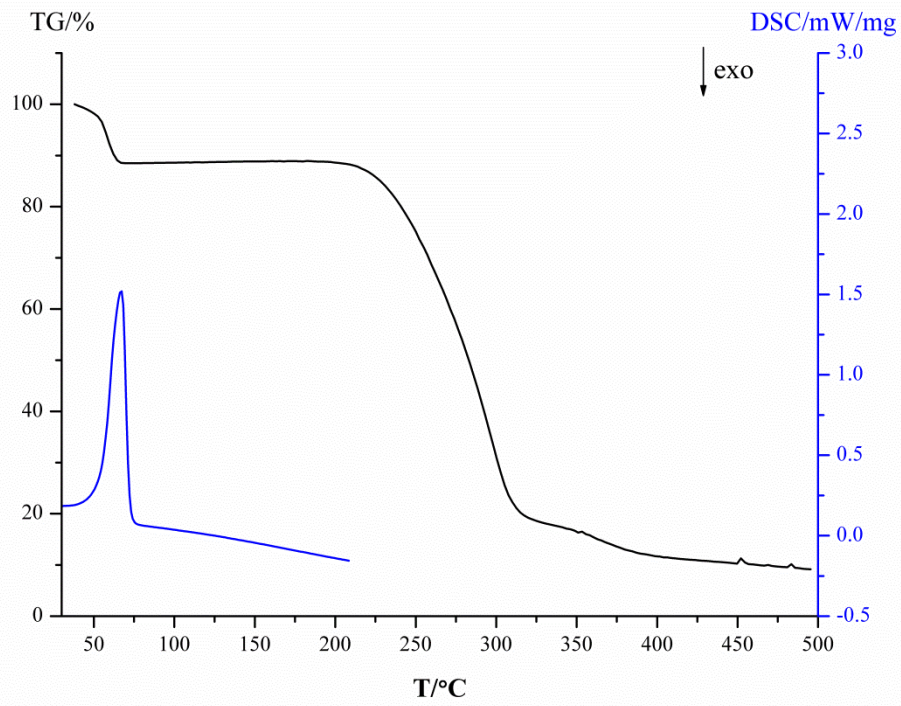

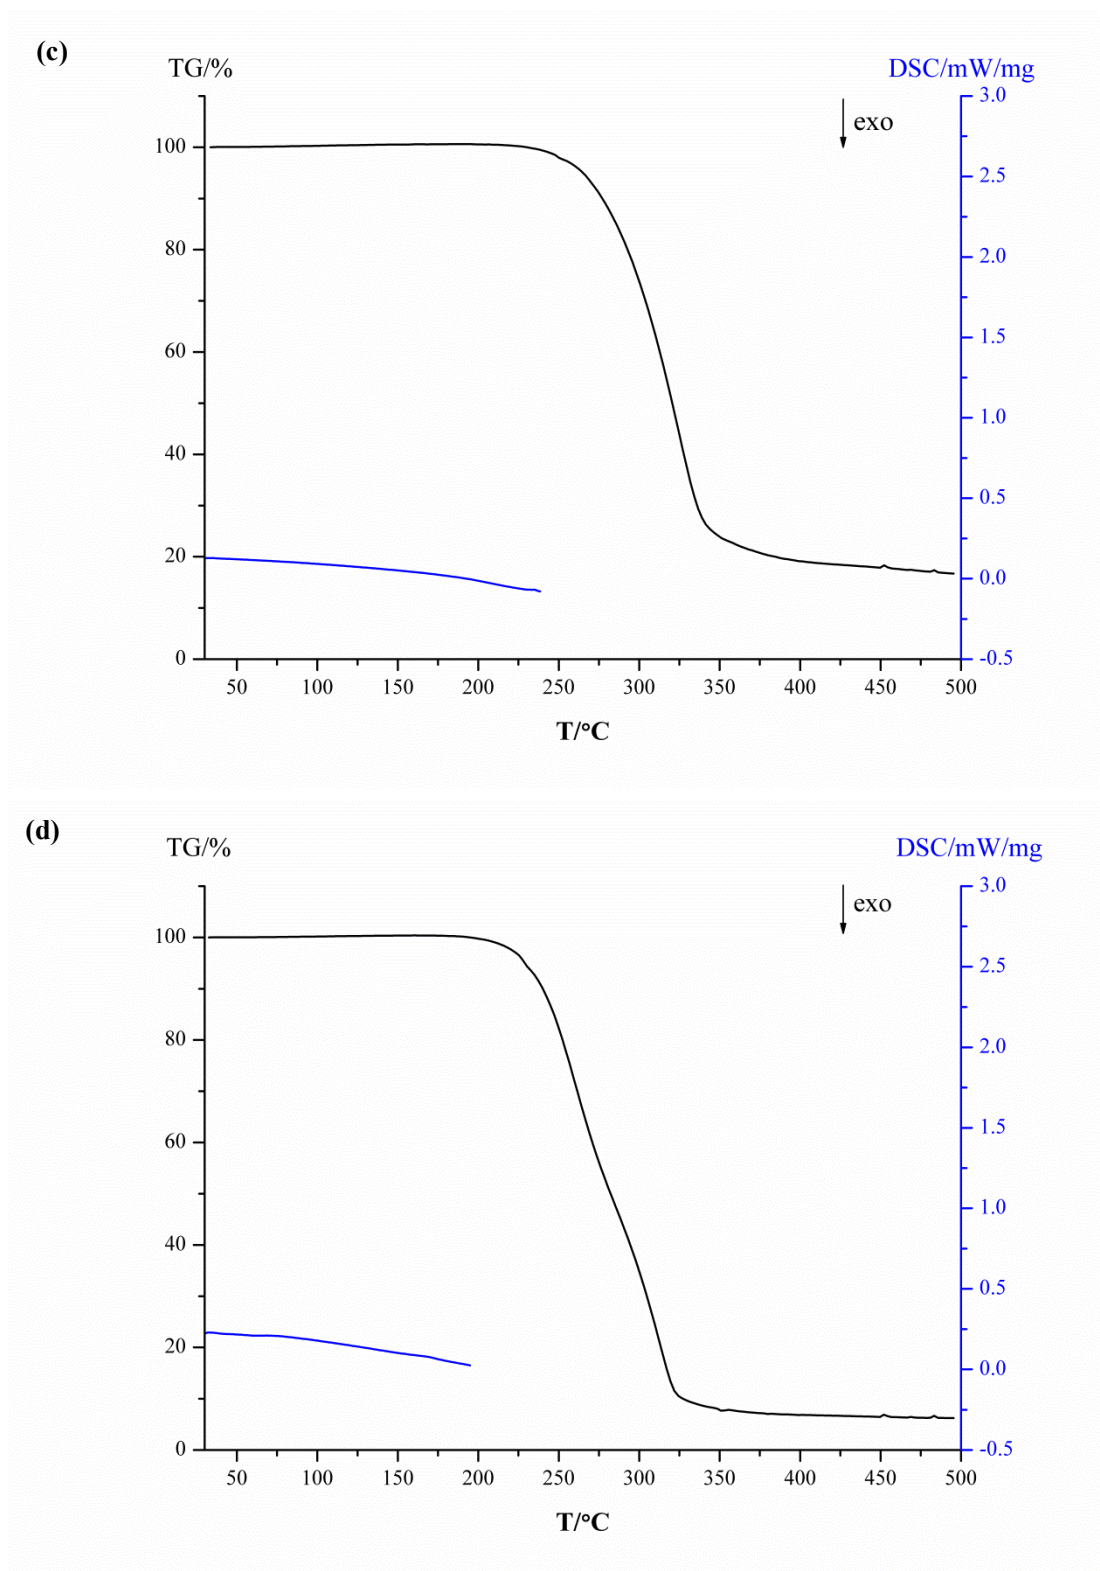

**Fig. S1** TG-DSC curves for (a) **5FU-34DHBA**, (b) **5FU-34DHBA·2H<sub>2</sub>O**, (c) **5FU-35DHBA** and (d) **5FU-25DHBA**.

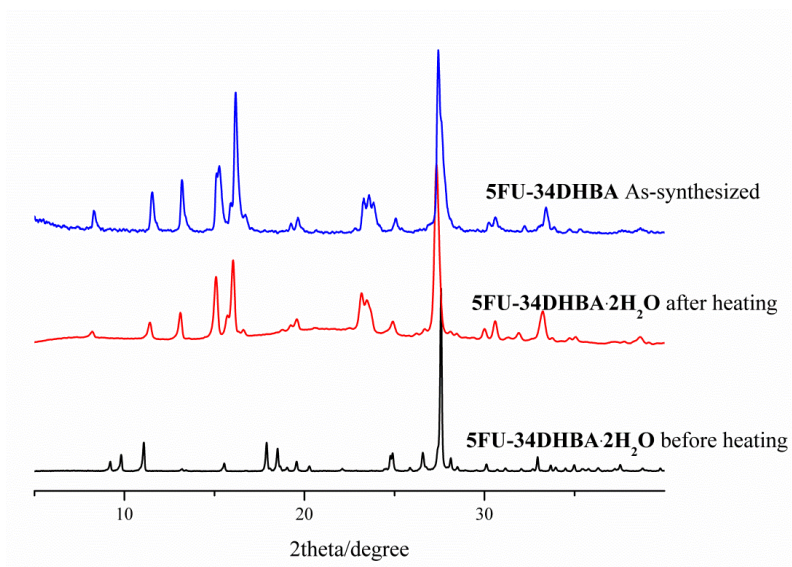

**Fig. S2** PXR D patterns before and after heating of **5FU-34DHBA·2H<sub>2</sub>O**.

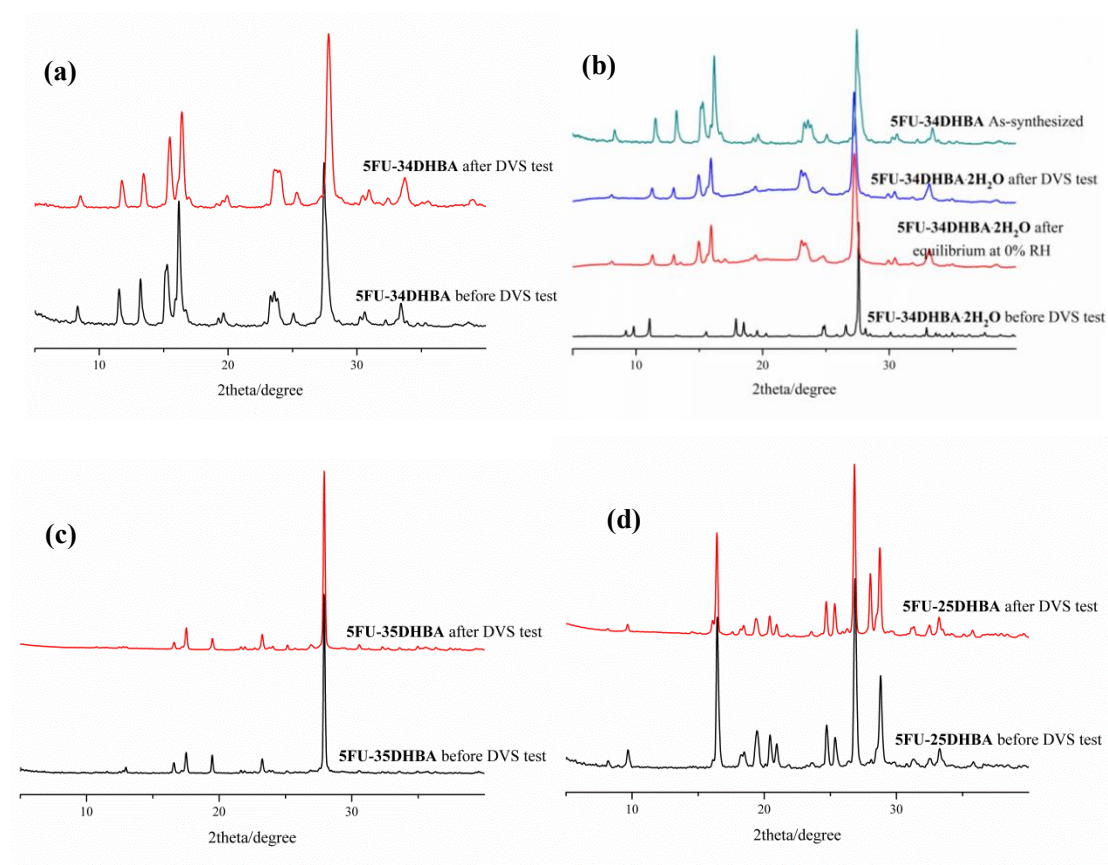

**Fig. S3** PXR D patterns before and after DVS test for (a) **5FU-34DHBA**, (b) **5FU-34DHBA·2H<sub>2</sub>O**, (c) **5FU-35DHBA** and (d) **5FU-25DHBA**.



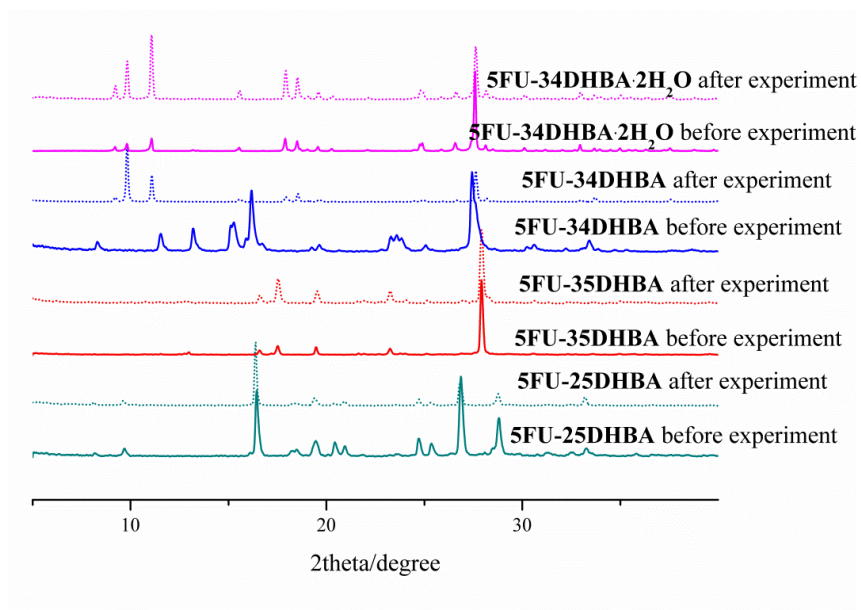

**Fig. S4** PXRD patterns of cocrystals before and after dissolution experiments.
